# Supplementary material for: Mesenchymal stem cell suppresses the efficacy of CAR-T toward killing lymphoma cells by modulating the microenvironment through stanniocalcin-1
Source: eLife. 2023 Feb 13;12:e82934. doi: 10.7554/eLife.82934 (PMC10019890; doi:10.7554/eLife.82934)
Supplement: Figure 1—source data 3. [file elife-82934-fig1-data3.xlsx]

## Sheet: Sheet1
Group1	Replicate1	Replicate2	Replicate3	Average	Group2	Replicate1	Replicate2	Replicate3	Average	Group3	Replicate1	Replicate2	Replicate3	Average
hMSCs shCtrl	99.6	99.8	98	99.1333	hMSCs shCtrl	99.4	99.6	98	99	hMSCs shCtrl	99.2	97	98	98.0667
hMSCs shSTC1	87.2	81.3	85	84.5	hMSCs shSTC1	80.5	87.6	86.8	84.9667	hMSCs shSTC1	85	87.9	81	84.6333
Between Groups	hMSCs shCtrl	hMSCs shSTC1
Replicate1	99.1	84.5
Replicate2	99	85
Replicate3	98.1	84.6
	98.7333	84.7
	0.550757	0.264575
