# Supplementary material for: Mesenchymal stem cell suppresses the efficacy of CAR-T toward killing lymphoma cells by modulating the microenvironment through stanniocalcin-1
Source: eLife. 2023 Feb 13;12:e82934. doi: 10.7554/eLife.82934 (PMC10019890; doi:10.7554/eLife.82934)
Supplement: Figure 2—source data 1. [file elife-82934-fig2-data1.xlsx]

## Sheet: Sheet1
		重复1	重复2	重复3	平均值			重复1	重复2	重复3	平均值			重复1	重复2	重复3	平均值
组内1	CD19 CAR-T+THP1+Pfeiffer	0	0	0	0	组内2	CD19 CAR-T+THP1+Pfeiffer	0	0	0	0	组内3	CD19 CAR-T+THP1+Pfeiffer	0	0	0	0
	CD19 CAR-TCD19 CAR-T+THP1+Pfeiffer+hMSCsshCTRL	172.7	160	149.5	160.733		CD19 CAR-T+THP1+Pfeiffer+hMSCsshCTRL	181	169.8	190.8	180.533		CD19 CAR-TCD19 CAR-T+THP1+Pfeiffer+hMSCsshCTRL	175.8	181	185.5	180.767
	CD19 CAR-T+THP1+Pfeiffer+hMSCsshSTC1	1705	1674	1810	1729.67		CD19 CAR-T+THP1+Pfeiffer+hMSCsshSTC1	1561	1748	1821	1710		CD19 CAR-T+THP1+Pfeiffer+hMSCsshSTC1	1890	1627	1735	1750.67
Between groups
CD19 CAR-T+THP1+Pfeiffer	0	24h	48h	CD19 CAR-TCD19 CAR-T+THP1+Pfeiffer+hMSCsshCTRL	0	24h	48h	CD19 CAR-T+THP1+Pfeiffer+hMSCsshSTC1	0	24h	48h
Replicate1	0	69.8	92.9	Replicate1	0	31.6	45.7	Replicate1	0	61.4	87.4
Replicate2	0	63.7	90.8	Replicate2	0	35.9	47.6	Replicate2	0	63	88
Replicate3	0	66.9	93.7	Replicate3	0	33	43.1	Replicate3	0	60	84.3
Average	0	66.8	92.4667	Average	0	33.5	45.4667	Average	0	61.4667	86.5667
	0	3.05123	1.49778		0	2.19317	2.25906		0	1.50111	1.98578
Between groups	0	24h	48h
CD19 CAR-T+THP1+Pfeiffer	0	66.8	92.5
CD19 CAR-TCD19 CAR-T+THP1+Pfeiffer+hMSCsshCTRL	0	33.5	45.5
CD19 CAR-T+THP1+Pfeiffer+hMSCsshSTC1	0	61.4	86.6
