# Supplementary material for: Mesenchymal stem cell suppresses the efficacy of CAR-T toward killing lymphoma cells by modulating the microenvironment through stanniocalcin-1
Source: eLife. 2023 Feb 13;12:e82934. doi: 10.7554/eLife.82934 (PMC10019890; doi:10.7554/eLife.82934)
Supplement: Figure 2—source data 2. [file elife-82934-fig2-data2.xlsx]

## Sheet: Sheet1
	(%)	CD19 CAR-T+THP1+Pfeiffer	CD19 CAR-T+THP1+Pfeiffer+hMSCsshCTRL	CD19 CAR-T+THP1+Pfeiffer+hMSCsshSTC1
	CD4	16.6	60.87	21.9
		18	57.22	20
		17.2	67	22
		17.2667	61.6967	21.3
		0.488889	3.53556	0.866667
	CD8	76.2	33	70
		78	31.8	68
		75	32	73
		76.4	32.2667	70.3333
		1.06667	0.488889	1.77778
