# Supplementary material for: Mesenchymal stem cell suppresses the efficacy of CAR-T toward killing lymphoma cells by modulating the microenvironment through stanniocalcin-1
Source: eLife. 2023 Feb 13;12:e82934. doi: 10.7554/eLife.82934 (PMC10019890; doi:10.7554/eLife.82934)
Supplement: Figure 2—source data 3. [file elife-82934-fig2-data3.xlsx]

## Sheet: Sheet1
	CD19 CAR-T+THP1+Pfeiffer	CD19 CAR-T+THP1+Pfeiffer+hMSCsshCTRL	CD19 CAR-T+THP1+Pfeiffer+hMSCsshSTC1
Replicate1	3.18	11.6	3
Replicate2	3	14	2.7
Replicate3	4	12	2.9
Average	3.39333	12.5333	2.86667
	0.404444	0.977778	0.111111
