# Supplementary material for: Mesenchymal stem cell suppresses the efficacy of CAR-T toward killing lymphoma cells by modulating the microenvironment through stanniocalcin-1
Source: eLife. 2023 Feb 13;12:e82934. doi: 10.7554/eLife.82934 (PMC10019890; doi:10.7554/eLife.82934)
Supplement: Figure 3—source data 3. [file elife-82934-fig3-data3.xlsx]

## Sheet: Sheet1
		Replicate1	Replicate2	Replicate3	Average			Replicate1	Replicate2	Replicate3	Average			Replicate1	Replicate2	Replicate3	Average
Group1	Pfeiffer	0	0	0	0	Group2	Pfeiffer	0	0	0	0	Group3	Pfeiffer	0	0	0	0
	CD19 CAR-T	172.7	160	149.5	160.733		CD19 CAR-T	181	169.8	190.8	180.533		CD19 CAR-T	175.8	181	185.5	180.767
	M-THP	1705	1674	1810	1729.67		M-THP	1561	1748	1821	1710		M-THP	1890	1627	1735	1750.67
	hMSCs shCtrl	566.4	620.2	609	598.533		hMSCs shCtrl	601.6	586	610.2	599.267		hMSCs shCtrl	714.7	827.2	862	801.3
	hMSCs shSTC1	1367	1690.8	1593.4	1550.4		hMSCs shSTC1	1529	1597.2	1403.7	1509.97		hMSCs shSTC1	1796	1520.6	1644.4	1653.67
Between Groups	Pfeiffer	CD19 CAR-T	M-THP	hMSCs shCtrl	hMSCs shSTC1
Replicate1	0	160.7	1729.7	598.5	1550.4
Replicate2	0	180.5	1710	599.3	1510
Replicate3	0	180.8	1750.7	801.3	1653.7
Average	0	174	1730.13	666.367	1571.37
		8.86667	13.7111	89.9556	54.8889
