# Supplementary material for: Mesenchymal stem cell suppresses the efficacy of CAR-T toward killing lymphoma cells by modulating the microenvironment through stanniocalcin-1
Source: eLife. 2023 Feb 13;12:e82934. doi: 10.7554/eLife.82934 (PMC10019890; doi:10.7554/eLife.82934)
Supplement: Figure 3—source data 4. [file elife-82934-fig3-data4.xlsx]

## Sheet: Sheet1
	CD19 CAR-T+THP1+Pfeiffer	CD19 CAR-T+THP1+Pfeiffer+hMSCsshCTRL	CD19 CAR-T+THP1+Pfeiffer+hMSCsshSTC1
Replicate1	59.72	10.87	51.84
Replicate2	54.2	11.42	53.5
Replicate3	58.58	9.7	52.8
Average	57.5	10.6633	52.7133
	2.91417	0.878427	0.833387
