# Supplementary material for: Mesenchymal stem cell suppresses the efficacy of CAR-T toward killing lymphoma cells by modulating the microenvironment through stanniocalcin-1
Source: eLife. 2023 Feb 13;12:e82934. doi: 10.7554/eLife.82934 (PMC10019890; doi:10.7554/eLife.82934)
Supplement: Figure 4—source data 1. [file elife-82934-fig4-data1.xlsx]

## Sheet: Sheet1
	control	0day	14day	28day	35day	CD19 CAR-T+hMSCs shSTC1	0day	14day	28day	35day	CD19 CAR-T+hMSCs shCtrl	0day	14day	28day	35day
	Mice1	400	580	710	910	Mice1	580	420	200	0	Mice1	560	440	610	830
	Mice2	420	550	680	890	Mice2	680	390	240	0	Mice2	570	430	640	810
	Mice3	400	570	700	900	Mice3	610	430	220	0	Mice3	600	440	620	830
	Average	406.667	566.667	696.667	900	Average	623.333	413.333	220	0	Average	576.667	436.667	623.333	823.333
		8.88889	11.1111	11.1111	6.66667		37.7778	15.5556	13.3333	0		15.5556	4.44444	11.1111	8.88889
