# Supplementary material for: Mesenchymal stem cell suppresses the efficacy of CAR-T toward killing lymphoma cells by modulating the microenvironment through stanniocalcin-1
Source: eLife. 2023 Feb 13;12:e82934. doi: 10.7554/eLife.82934 (PMC10019890; doi:10.7554/eLife.82934)
Supplement: Figure 4—source data 2. [file elife-82934-fig4-data2.xlsx]

## Sheet: Sheet1
*107	control	0day	14day	28day	*107	CD19 CAR-T+hMSCs shSTC1	0day	14day	28day	*107	CD19 CAR-T+hMSCs shCtrl	0day	14day	28day
	Mice1	1.45	1.9	2.18		Mice1	1.06	1.58	2		Mice1	1.71	1.52	0.7
	Mice2	1.6	1.72	1.96		Mice2	1.8	1.32	2.12		Mice2	1.6	1.4	0.85
	Mice3	1.45	1.68	2.06		Mice3	1.54	1.5	2.1		Mice3	1.9	1.5	0.76
	Average	1.5	1.76667	2.06667		Average	1.46667	1.46667	2.07333		Average	1.73667	1.47333	0.77
		0.0666667	0.0888889	0.0755556			0.271111	0.0977778	0.0488889			0.108889	0.0488889	0.0533333
